# Supplementary material for: Door-in-door-out times for patients with large vessel occlusion ischaemic stroke being transferred for endovascular thrombectomy: a Victorian state-wide study
Source: HighWire-hosted journal article supplement (doi:10.1136/bmjno-2022-000376), 2023-01-01
Supplement: bmjno-2022-000376supp001_data_supplement.pdf [file bmjno-2022-000376supp001_data_supplement.pdf]

Supplementary table 1. Complete data for individual metropolitan sites.

| Metropolitan Sites                     | Box Hill<br>(N=85) | Frankston<br>(N=17)  | Geelong<br>(N=55)  | Maroondah<br>(N=1) | Northern<br>(N=48)   | Sunshine<br>(N=64) | Western<br>(N=9)     | Overall<br>(N=279) |
|----------------------------------------|--------------------|----------------------|--------------------|--------------------|----------------------|--------------------|----------------------|--------------------|
| <b>Sex</b>                             |                    |                      |                    |                    |                      |                    |                      |                    |
| Female                                 | 40 (47.1%)         | 8 (47.1%)            | 26 (47.3%)         | 1 (100%)           | 20 (41.7%)           | 25 (39.1%)         | 4 (44.4%)            | 124 (44.4%)        |
| Male                                   | 45 (52.9%)         | 9 (52.9%)            | 29 (52.7%)         | 0 (0%)             | 28 (58.3%)           | 39 (60.9%)         | 5 (55.6%)            | 155 (55.6%)        |
| <b>Age (years)</b>                     |                    |                      |                    |                    |                      |                    |                      |                    |
| Median [Q1, Q3]                        | 74 [65, 82]        | 77 [72, 80]          | 71 [62.5, 77]      | 83 [83, 83]        | 70.5<br>[64.8, 81.3] | 70 [64, 80]        | 68 [64, 80]          | 73 [64, 81]        |
| <b>NIHSS score on first assessment</b> |                    |                      |                    |                    |                      |                    |                      |                    |
| Median [Q1, Q3]                        | 17 [11, 22]        | 16 [11, 19]          | 14 [70, 18]        | NA                 | 12 [9, 18]           | 17 [10, 20]        | 14 [11, 17]          | 15.5 [10, 20]      |
| Missing                                | 0 (0%)             | 2 (11.8%)            | 1 (1.8%)           | 1 (100%)           | 13 (27.1%)           | 11 (17.2%)         | 3 (33.3%)            | 31 (11.1%)         |
| <b>Pre-morbid mRS</b>                  |                    |                      |                    |                    |                      |                    |                      |                    |
| 0                                      | 57 (67.1%)         | 13 (76.5%)           | 37 (67.3%)         | 0 (0%)             | 14 (29.2%)           | 51 (79.7%)         | 8 (88.9%)            | 180 (64.5%)        |
| 1                                      | 25 (29.4%)         | 1 (5.9%)             | 8 (14.5%)          | 1 (100%)           | 2 (4.2%)             | 6 (9.4%)           | 1 (11.1%)            | 44 (15.8%)         |
| 2                                      | 2 (2.4%)           | 0 (0%)               | 4 (7.3%)           | 0 (0%)             | 3 (6.3%)             | 0 (0%)             | 0 (0%)               | 9 (3.2%)           |
| ≥3                                     | 1 (1.2%)           | 1 (5.9%)             | 1 (1.8%)           | 0 (0%)             | 6 (12.5%)            | 2 (3.1%)           | 0 (0%)               | 11 (4%)            |
| Missing                                | 0 (0%)             | 2 (11.8%)            | 5 (9.1%)           | 0 (0%)             | 23 (47.9%)           | 5 (7.8%)           | 0 (0%)               | 35 (12.5%)         |
| <b>Inbound travel time (mins)</b>      |                    |                      |                    |                    |                      |                    |                      |                    |
| Median [Q1, Q3]                        | 19 [13.5, 24]      | 23.5<br>[19.5, 28.8] | 20.5<br>[12, 28.8] | NA                 | 16 [14, 25.8]        | 21.5 [13, 27]      | 22.5<br>[19.3, 25.8] | 19 [14, 26]        |
| Missing                                | 18 (21.2%)         | 3 (17.6%)            | 21 (38.2%)         | 1 (100%)           | 18 (37.5%)           | 12 (18.8%)         | 7 (77.8%)            | 80 (28.7%)         |
| <b>Door to CT time (mins)</b>          |                    |                      |                    |                    |                      |                    |                      |                    |
| Median [Q1, Q3]                        | 10.5 [6, 16]       | 15 [6, 22.5]         | 22 [16, 32]        | 38 [38, 38]        | 17 [12.3, 25.8]      | 25 [21, 43]        | 40 [32.5, 62.5]      | 19 [11, 28]        |
| Missing                                | 3 (3.5%)           | 1 (5.9%)             | 2 (3.6%)           | 0 (0%)             | 10 (20.8%)           | 3 (4.7%)           | 2 (22.2%)            | 21 (7.5%)          |

| <b>Metropolitan Sites<br/>(continued)</b>                   | <b>Box Hill<br/>(N=85)</b> | <b>Frankston<br/>(N=17)</b> | <b>Geelong<br/>(N=55)</b> | <b>Maroondah<br/>(N=1)</b> | <b>Northern<br/>(N=48)</b> | <b>Sunshine<br/>(N=64)</b> | <b>Western<br/>(N=9)</b> | <b>Overall<br/>(N=279)</b> |
|-------------------------------------------------------------|----------------------------|-----------------------------|---------------------------|----------------------------|----------------------------|----------------------------|--------------------------|----------------------------|
| <b>Thrombolysis</b>                                         |                            |                             |                           |                            |                            |                            |                          |                            |
| Yes                                                         | 55 (64.7%)                 | 7 (41.2%)                   | 22 (40%)                  | 0 (0%)                     | 18 (37.5%)                 | 37 (57.8%)                 | 3 (33.3%)                | 142 (50.9%)                |
| No                                                          | 30 (35.3%)                 | 9 (52.9%)                   | 32 (58.2%)                | 0 (0%)                     | 21 (43.8%)                 | 25 (39.1%)                 | 5 (55.6%)                | 122 (43.7%)                |
| Missing                                                     | 0 (0%)                     | 1 (5.9%)                    | 1 (1.8%)                  | 1 (100%)                   | 9 (18.8%)                  | 2 (3.1%)                   | 1 (11.1%)                | 15 (5.4%)                  |
| <b>Door to Needle time (mins)</b>                           |                            |                             |                           |                            |                            |                            |                          |                            |
| Median [Q1, Q3]                                             | 50 [37, 59.5]              | 79 [55.5, 89]               | 75 [57, 107]              | NA                         | 57.5 [47.3, 85]            | 88 [73, 109]               | 85 [83, 94.5]            | 62 [50, 88]                |
| Missing                                                     | 30 (35.3%)                 | 10 (58.8%)                  | 33 (60%)                  | 1 (100%)                   | 30 (62.5%)                 | 27 (42.2%)                 | 6 (66.7%)                | 137 (49.1%)                |
| <b>Door in Door out time (mins)</b>                         |                            |                             |                           |                            |                            |                            |                          |                            |
| Median [Q1, Q3]                                             | 82 [65, 113]               | 146 [131, 187]              | 131 [100, 159]            | 107 [107, 107]             | 97 [83, 127]               | 117 [97, 148]              | 105 [105, 106]           | 107 [84, 145]              |
| Missing                                                     | 3 (3.5%)                   | 3 (17.6%)                   | 1 (1.8%)                  | 0 (0%)                     | 9 (18.8%)                  | 16 (25%)                   | 6 (66.7%)                | 38 (13.6%)                 |
| <b>Multi-leg outbound journey,<br/>n (%)</b>                |                            |                             |                           |                            |                            |                            |                          |                            |
| TRUE                                                        | 0 (0%)                     | 0 (0%)                      | 1 (1.8%)                  | 0 (0%)                     | 0 (0%)                     | 1 (1.6%)                   | 0 (0%)                   | 2 (0.7%)                   |
| FALSE                                                       | 85 (100%)                  | 17 (100%)                   | 44 (80%)                  | 1 (100%)                   | 37 (77.1%)                 | 63 (98.4%)                 | 9 (100%)                 | 256 (91.8%)                |
| Unknown                                                     | 0 (0%)                     | 0 (0%)                      | 10 (18.2%)                | 0 (0%)                     | 11 (22.9%)                 | 0 (0%)                     | 0 (0%)                   | 21 (7.5%)                  |
| <b>Outbound transport<br/>involving air transfer, n (%)</b> |                            |                             |                           |                            |                            |                            |                          |                            |
| TRUE                                                        | 0 (0%)                     | 0 (0%)                      | 3 (5.5%)                  | 0 (0%)                     | 0 (0%)                     | 0 (0%)                     | 0 (0%)                   | 3 (1.1%)                   |
| FALSE                                                       | 85 (100%)                  | 17 (100%)                   | 47 (85.5%)                | 1 (100%)                   | 48 (100%)                  | 64 (100%)                  | 9 (100%)                 | 271 (97.1%)                |
| Unknown                                                     | 0 (0%)                     | 0 (0%)                      | 5 (9.1%)                  | 0 (0%)                     | 0 (0%)                     | 0 (0%)                     | 0 (0%)                   | 5 (1.8%)                   |
| <b>PSC to CSC travel time<br/>(mins)</b>                    |                            |                             |                           |                            |                            |                            |                          |                            |
| Median [Q1, Q3]                                             | 22 [19, 26]                | 32 [27, 36]                 | 57 [51.5, 62]             | 33 [33, 33]                | 30 [27, 34]                | 22.5 [18.8, 27]            | 17 [16, 20]              | 26 [20, 35]                |
| Missing                                                     | 19 (22.4%)                 | 4 (23.5%)                   | 12 (21.8%)                | 0 (0%)                     | 15 (31.3%)                 | 8 (12.5%)                  | 0 (0%)                   | 58 (20.8%)                 |

Supplementary table 2. Complete data for individual regional sites.

| <b>Regional sites A-H</b>              | <b>Albury<br/>(N=22)</b> | <b>Bairnsdale<br/>(N=9)</b> | <b>Ballarat<br/>(N=23)</b> | <b>Bendigo<br/>(N=21)</b> | <b>Castlemaine<br/>(N=1)</b> | <b>Echuca<br/>(N=10)</b> | <b>Hamilton<br/>(N=3)</b> | <b>Horsham<br/>(N=1)</b> |
|----------------------------------------|--------------------------|-----------------------------|----------------------------|---------------------------|------------------------------|--------------------------|---------------------------|--------------------------|
| <b>Sex</b>                             |                          |                             |                            |                           |                              |                          |                           |                          |
| Female                                 | 10 (45.5%)               | 2 (22.2%)                   | 8 (34.8%)                  | 7 (33.3%)                 | 1 (100%)                     | 3 (30%)                  | 1 (33.3%)                 | 0 (0%)                   |
| Male                                   | 12 (54.5%)               | 7 (77.8%)                   | 15 (65.2%)                 | 14 (66.7%)                | 0 (0%)                       | 7 (70%)                  | 2 (66.7%)                 | 1 (100%)                 |
| <b>Age (years)</b>                     |                          |                             |                            |                           |                              |                          |                           |                          |
| Median [Q1, Q3]                        | 73.5 [68, 81]            | 76 [67, 79]                 | 69 [58, 75.5]              | 76 [68, 79]               | 89 [89, 89]                  | 72.5 [67.3, 77.8]        | 77 [65, 79.5]             | 71 [71, 71]              |
| <b>NIHSS score on first assessment</b> |                          |                             |                            |                           |                              |                          |                           |                          |
| Median [Q1, Q3]                        | 16 [11.3, 19]            | 5 [2, 17]                   | 17 [11, 24]                | 11 [7, 18]                | NA                           | 16 [15, 17]              | 18 [15, 18.5]             | 14 [14, 14]              |
| Missing                                | 0 (0%)                   | 0 (0%)                      | 8 (34.8%)                  | 0 (0%)                    | 1 (100%)                     | 1 (10%)                  | 0 (0%)                    | 0 (0%)                   |
| <b>Pre-morbid mRS</b>                  |                          |                             |                            |                           |                              |                          |                           |                          |
| 0                                      | 16 (72.7%)               | 7 (77.8%)                   | 12 (52.2%)                 | 19 (90.5%)                | 0 (0%)                       | 6 (60%)                  | 3 (100%)                  | 1 (100%)                 |
| 1                                      | 3 (13.6%)                | 2 (22.2%)                   | 2 (8.7%)                   | 1 (4.8%)                  | 0 (0%)                       | 2 (20%)                  | 0 (0%)                    | 0 (0%)                   |
| 2                                      | 3 (13.6%)                | 0 (0%)                      | 0 (0%)                     | 0 (0%)                    | 0 (0%)                       | 1 (10%)                  | 0 (0%)                    | 0 (0%)                   |
| ≥3                                     | 0 (0%)                   | 0 (0%)                      | 1 (4.3%)                   | 1 (4.8%)                  | 0 (0%)                       | 0 (0%)                   | 0 (0%)                    | 0 (0%)                   |
| Missing                                | 0 (0%)                   | 0 (0%)                      | 8 (34.8%)                  | 0 (0%)                    | 1 (100%)                     | 1 (10%)                  | 0 (0%)                    | 0 (0%)                   |
| <b>Inbound travel time (mins)</b>      |                          |                             |                            |                           |                              |                          |                           |                          |
| Median [Q1, Q3]                        | 12 [7, 13]               | 28 [14, 36]                 | 16 [8.75, 40.8]            | 9 [7, 29]                 | NA                           | 5 [4, 8.50]              | 17 [14.5, 19.5]           | NA                       |
| Missing                                | 17 (77.3%)               | 2 (22.2%)                   | 3 (13%)                    | 4 (19%)                   | 1 (100%)                     | 3 (30%)                  | 1 (33.3%)                 | 1 (100%)                 |
| <b>Door to CT time (mins)</b>          |                          |                             |                            |                           |                              |                          |                           |                          |
| Median [Q1, Q3]                        | NA                       | NA                          | NA                         | NA                        | NA                           | NA                       | NA                        | NA                       |
| Missing                                | 22 (100%)                | 9 (100%)                    | 23 (100%)                  | 21 (100%)                 | 1 (100%)                     | 10 (100%)                | 3 (100%)                  | 1 (100%)                 |

| <b>Regional sites A-H<br/>(continued)</b>               | <b>Albury<br/>(N=22)</b> | <b>Bairnsdale<br/>(N=9)</b> | <b>Ballarat<br/>(N=23)</b> | <b>Bendigo<br/>(N=21)</b> | <b>Castlemaine<br/>(N=1)</b> | <b>Echuca<br/>(N=10)</b> | <b>Hamilton<br/>(N=3)</b> | <b>Horsham<br/>(N=1)</b> |
|---------------------------------------------------------|--------------------------|-----------------------------|----------------------------|---------------------------|------------------------------|--------------------------|---------------------------|--------------------------|
| <b>Thrombolysis</b>                                     |                          |                             |                            |                           |                              |                          |                           |                          |
| Yes                                                     | 13 (59.1%)               | 3 (33.3%)                   | 9 (39.1%)                  | 11 (52.4%)                | 0 (0%)                       | 6 (60%)                  | 2 (66.7%)                 | 1 (100%)                 |
| No                                                      | 9 (40.9%)                | 6 (66.7%)                   | 14 (60.9%)                 | 10 (47.6%)                | 1 (100%)                     | 4 (40%)                  | 1 (33.3%)                 | 0 (0%)                   |
| <b>Door to Needle time (mins)</b>                       |                          |                             |                            |                           |                              |                          |                           |                          |
| Median [Q1, Q3]                                         | NA                       | NA                          | NA                         | NA                        | NA                           | NA                       | NA                        | NA                       |
| Missing                                                 | 22 (100%)                | 9 (100%)                    | 23 (100%)                  | 21 (100%)                 | 1 (100%)                     | 10 (100%)                | 3 (100%)                  | 1 (100%)                 |
| <b>Door in Door out time (mins)</b>                     |                          |                             |                            |                           |                              |                          |                           |                          |
| Median [Q1, Q3]                                         | NA                       | 170 [156, 207]              | 137 [106, 179]             | 121 [105, 166]            | NA                           | 164 [145, 211]           | 130 [114, 145]            | NA                       |
| Missing                                                 | 22 (100%)                | 4 (44.4%)                   | 8 (34.8%)                  | 9 (42.9%)                 | 1 (100%)                     | 3 (30%)                  | 1 (33.3%)                 | 1 (100%)                 |
| <b>Multi-leg outbound journey, n (%)</b>                |                          |                             |                            |                           |                              |                          |                           |                          |
| TRUE                                                    | 16 (72.7%)               | 8 (88.9%)                   | 1 (4.3%)                   | 9 (42.9%)                 | 0 (0%)                       | 8 (80%)                  | 3 (100%)                  | 0 (0%)                   |
| FALSE                                                   | 0 (0%)                   | 1 (11.1%)                   | 18 (78.3%)                 | 10 (47.6%)                | 0 (0%)                       | 2 (20%)                  | 0 (0%)                    | 0 (0%)                   |
| Unknown                                                 | 6 (27.3%)                | 0 (0%)                      | 4 (17.4%)                  | 2 (9.5%)                  | 1 (100%)                     | 0 (0%)                   | 0 (0%)                    | 1 (100%)                 |
| <b>Outbound transport involving air transfer, n (%)</b> |                          |                             |                            |                           |                              |                          |                           |                          |
| TRUE                                                    | 18 (81.8%)               | 7 (77.8%)                   | 2 (8.7%)                   | 8 (38.1%)                 | 0 (0%)                       | 10 (100%)                | 2 (66.7%)                 | 0 (0%)                   |
| FALSE                                                   | 0 (0%)                   | 2 (22.2%)                   | 18 (78.3%)                 | 11 (52.4%)                | 0 (0%)                       | 0 (0%)                   | 1 (33.3%)                 | 0 (0%)                   |
| Unknown                                                 | 4 (18.2%)                | 0 (0%)                      | 3 (13%)                    | 2 (9.5%)                  | 1 (100%)                     | 0 (0%)                   | 0 (0%)                    | 1 (100%)                 |
| <b>PSC to CSC travel time (mins)</b>                    |                          |                             |                            |                           |                              |                          |                           |                          |
| Median [Q1, Q3]                                         | NA                       | 95.5 [84.5, 115]            | 74 [67.3, 79.8]            | 92.5 [87.8, 94.8]         | NA                           | 80.5 [53.3, 92.8]        | 105 [101, 152]            | NA                       |
| Missing                                                 | 22 (100%)                | 5 (55.6%)                   | 7 (30.4%)                  | 7 (33.3%)                 | 1 (100%)                     | 0 (0%)                   | 0 (0%)                    | 1 (100%)                 |

| <b>Regional sites M-Wa</b>        | <b>Mildura<br/>(N=3)</b> | <b>Sale<br/>(N=6)</b> | <b>Shepparton<br/>(N=12)</b> | <b>Swan Hill<br/>(N=1)</b> | <b>Traralgon<br/>(N=14)</b> | <b>Wangaratta<br/>(N=14)</b> | <b>Warragul<br/>(N=7)</b> | <b>Warrnambool<br/>(N=9)</b> |
|-----------------------------------|--------------------------|-----------------------|------------------------------|----------------------------|-----------------------------|------------------------------|---------------------------|------------------------------|
| <b>Sex</b>                        |                          |                       |                              |                            |                             |                              |                           |                              |
| Female                            | 1 (33.3%)                | 6 (100%)              | 5 (41.7%)                    | 0 (0%)                     | 5 (35.7%)                   | 9 (64.3%)                    | 2 (28.6%)                 | 3 (33.3%)                    |
| Male                              | 2 (66.7%)                | 0 (0%)                | 7 (58.3%)                    | 1 (100%)                   | 9 (64.3%)                   | 5 (35.7%)                    | 5 (71.4%)                 | 6 (66.7%)                    |
| <b>Age (years)</b>                |                          |                       |                              |                            |                             |                              |                           |                              |
| Median [Q1, Q3]                   | 64 [59, 67]              | 75 [67.5, 79.5]       | 72.5 [56, 80.5]              | 72 [72, 72]                | 68.5 [62, 72.8]             | 74.5 [68.3, 82]              | 69 [66, 73]               | 66 [41, 75]                  |
| <b>NIHSS on arrival</b>           |                          |                       |                              |                            |                             |                              |                           |                              |
| Median [Q1, Q3]                   | 19 [9.50, 20]            | 11 [6.25, 21.8]       | 7 [2.50, 12.5]               | 12 [12, 12]                | 12.5 [7, 22.8]              | 17 [13, 21]                  | 13 [11, 15]               | 7 [2, 15]                    |
| Missing                           | 0 (0%)                   | 0 (0%)                | 1 (8.3%)                     | 0 (0%)                     | 0 (0%)                      | 3 (21.4%)                    | 0 (0%)                    | 0 (0%)                       |
| <b>Pre-morbid mRS</b>             |                          |                       |                              |                            |                             |                              |                           |                              |
| 0                                 | 3 (100%)                 | 6 (100%)              | 8 (66.7%)                    | 1 (100%)                   | 11 (78.6%)                  | 6 (42.9%)                    | 7 (100%)                  | 9 (100%)                     |
| 1                                 | 0 (0%)                   | 0 (0%)                | 1 (8.3%)                     | 0 (0%)                     | 3 (21.4%)                   | 2 (14.3%)                    | 0 (0%)                    | 0 (0%)                       |
| 2                                 | 0 (0%)                   | 0 (0%)                | 1 (8.3%)                     | 0 (0%)                     | 0 (0%)                      | 2 (14.3%)                    | 0 (0%)                    | 0 (0%)                       |
| ≥3                                | 0 (0%)                   | 0 (0%)                | 1 (8.3%)                     | 0 (0%)                     | 0 (0%)                      | 1 (7.1%)                     | 0 (0%)                    | 0 (0%)                       |
| Missing                           | 0 (0%)                   | 0 (0%)                | 1 (8.3%)                     | 0 (0%)                     | 0 (0%)                      | 3 (21.4%)                    | 0 (0%)                    | 0 (0%)                       |
| <b>Inbound travel time (mins)</b> |                          |                       |                              |                            |                             |                              |                           |                              |
| Median [Q1, Q3]                   | 50 [50, 50]              | 5 [4, 17.5]           | 12 [8, 32]                   | 16 [16, 16]                | 20 [10, 29]                 | 25 [5, 36]                   | 10 [7.50, 10]             | 41.5 [19.5, 49]              |
| Missing                           | 2 (66.7%)                | 3 (50%)               | 3 (25%)                      | 0 (0%)                     | 1 (7.1%)                    | 1 (7.1%)                     | 4 (57.1%)                 | 1 (11.1%)                    |
| <b>Door to CT time (mins)</b>     |                          |                       |                              |                            |                             |                              |                           |                              |
| Median [Q1, Q3]                   | NA                       | NA                    | NA                           | NA                         | NA                          | NA                           | NA                        | NA                           |
| Missing                           | 3 (100%)                 | 6 (100%)              | 12 (100%)                    | 1 (100%)                   | 14 (100%)                   | 14 (100%)                    | 7 (100%)                  | 9 (100%)                     |

| <b>Regional sites M-Wa<br/>(continued)</b>       | <b>Mildura<br/>(N=3)</b> | <b>Sale<br/>(N=6)</b> | <b>Shepparton<br/>(N=12)</b> | <b>Swan Hill<br/>(N=1)</b> | <b>Traralgon<br/>(N=14)</b> | <b>Wangaratta<br/>(N=14)</b> | <b>Warragul<br/>(N=7)</b> | <b>Warrnambool<br/>(N=9)</b> |
|--------------------------------------------------|--------------------------|-----------------------|------------------------------|----------------------------|-----------------------------|------------------------------|---------------------------|------------------------------|
| <b>Thrombolysis</b>                              |                          |                       |                              |                            |                             |                              |                           |                              |
| Yes                                              | 2 (66.7%)                | 3 (50%)               | 8 (66.7%)                    | 1 (100%)                   | 9 (64.3%)                   | 8 (57.1%)                    | 6 (85.7%)                 | 5 (55.6%)                    |
| No                                               | 1 (33.3%)                | 3 (50%)               | 4 (33.3%)                    | 0 (0%)                     | 5 (35.7%)                   | 6 (42.9%)                    | 1 (14.3%)                 | 4 (44.4%)                    |
| <b>Door to Needle time (mins)</b>                |                          |                       |                              |                            |                             |                              |                           |                              |
| Median [Q1, Q3]                                  | NA                       | NA                    | NA                           | NA                         | NA                          | NA                           | NA                        | NA                           |
| Missing                                          | 3 (100%)                 | 6 (100%)              | 12 (100%)                    | 1 (100%)                   | 14 (100%)                   | 14 (100%)                    | 7 (100%)                  | 9 (100%)                     |
| <b>Door in Door out time (mins)</b>              |                          |                       |                              |                            |                             |                              |                           |                              |
| Median [Q1, Q3]                                  | 239 [239, 239]           | 123 [123, 123]        | 149 [136, 166]               | 204 [204, 204]             | 118 [112, 125]              | 142 [121, 182]               | 144 [111, 144]            | 123 [91, 141]                |
| Missing                                          | 2 (66.7%)                | 5 (83.3%)             | 6 (50%)                      | 0 (0%)                     | 3 (21.4%)                   | 5 (35.7%)                    | 4 (57.1%)                 | 2 (22.2%)                    |
| <b>Multi-leg outbound journey</b>                |                          |                       |                              |                            |                             |                              |                           |                              |
| TRUE                                             | 2 (66.7%)                | 2 (33.3%)             | 7 (58.3%)                    | 1 (100%)                   | 1 (7.1%)                    | 12 (85.7%)                   | 0 (0%)                    | 9 (100%)                     |
| FALSE                                            | 0 (0%)                   | 2 (33.3%)             | 4 (33.3%)                    | 0 (0%)                     | 11 (78.6%)                  | 2 (14.3%)                    | 5 (71.4%)                 | 0 (0%)                       |
| Unknown                                          | 1 (33.3%)                | 2 (33.3%)             | 1 (8.3%)                     | 0 (0%)                     | 2 (14.3%)                   | 0 (0%)                       | 2 (28.6%)                 | 0 (0%)                       |
| <b>Outbound transport involving air transfer</b> |                          |                       |                              |                            |                             |                              |                           |                              |
| TRUE                                             | 3 (100%)                 | 3 (50%)               | 6 (50%)                      | 1 (100%)                   | 1 (7.1%)                    | 11 (78.6%)                   | 0 (0%)                    | 8 (88.9%)                    |
| FALSE                                            | 0 (0%)                   | 2 (33.3%)             | 5 (41.7%)                    | 0 (0%)                     | 12 (85.7%)                  | 3 (21.4%)                    | 5 (71.4%)                 | 1 (11.1%)                    |
| Unknown                                          | 0 (0%)                   | 1 (16.7%)             | 1 (8.3%)                     | 0 (0%)                     | 1 (7.1%)                    | 0 (0%)                       | 2 (28.6%)                 | 0 (0%)                       |
| <b>PSC to CSC travel time (mins)</b>             |                          |                       |                              |                            |                             |                              |                           |                              |
| Median [Q1, Q3]                                  | 162 [162, 162]           | 65 [65, 65]           | 103 [99.8, 111]              | 115 [115, 115]             | 90 [82.8, 97.8]             | 125 [101, 136]               | 64 [55, 73]               | 103 [98.5, 123]              |
| Missing                                          | 2 (66.7%)                | 5 (83.3%)             | 4 (33.3%)                    | 0 (0%)                     | 2 (14.3%)                   | 4 (28.6%)                    | 2 (28.6%)                 | 1 (11.1%)                    |

| <b>Regional sites We-Wo</b>       | <b>Werribee<br/>(N=8)</b> | <b>Wodonga<br/>(N=1)</b> | <b>Wonthaggi<br/>(N=10)</b> | <b>Overall<br/>(N=176)</b> |
|-----------------------------------|---------------------------|--------------------------|-----------------------------|----------------------------|
| <b>Sex</b>                        |                           |                          |                             |                            |
| Female                            | 6 (75%)                   | 0 (0%)                   | 3 (30%)                     | 72 (40.9%)                 |
| Male                              | 2 (25%)                   | 1 (100%)                 | 7 (70%)                     | 104 (59.1%)                |
| <b>Age (years)</b>                |                           |                          |                             |                            |
| Median [Q1, Q3]                   | 75 [69.3, 79]             | 59 [59, 59]              | 73.5 [67, 75.8]             | 72 [64, 78]                |
| <b>NIHSS on arrival</b>           |                           |                          |                             |                            |
| Median [Q1, Q3]                   | 11.5 [4.25, 16.5]         | 15 [15, 15]              | 12.5 [8.25, 13.8]           | 14 [7, 19]                 |
| Missing                           | 2 (25%)                   | 0 (0%)                   | 0 (0%)                      | 16 (9.1%)                  |
| <b>Pre-morbid mRS</b>             |                           |                          |                             |                            |
| 0                                 | 6 (75%)                   | 1 (100%)                 | 9 (90%)                     | 131 (74.4%)                |
| 1                                 | 0 (0%)                    | 0 (0%)                   | 0 (0%)                      | 17 (9.7%)                  |
| 2                                 | 0 (0%)                    | 0 (0%)                   | 1 (10%)                     | 8 (4.5%)                   |
| ≥3                                | 0 (0%)                    | 0 (0%)                   | 0 (0%)                      | 4 (2.3%)                   |
| Missing                           | 2 (25%)                   | 0 (0%)                   | 0 (0%)                      | 16 (9.1%)                  |
| <b>Inbound travel time (mins)</b> |                           |                          |                             |                            |
| Median [Q1, Q3]                   | 15 [11, 24.8]             | 56 [56, 56]              | 17 [10.5, 24.5]             | 16 [8, 34]                 |
| Missing                           | 4 (50%)                   | 0 (0%)                   | 3 (30%)                     | 55 (31.3%)                 |
| <b>Door to CT time (mins)</b>     |                           |                          |                             |                            |
| Median [Q1, Q3]                   | NA                        | NA                       | NA                          | NA                         |
| Missing                           | 8 (100%)                  | 1 (100%)                 | 10 (100%)                   | 176 (100%)                 |

| <b>Regional sites We-Wo<br/>(continued)</b>      | <b>Werribee<br/>(N=8)</b> | <b>Wodonga<br/>(N=1)</b> | <b>Wonthaggi<br/>(N=10)</b> | <b>Overall<br/>(N=176)</b> |
|--------------------------------------------------|---------------------------|--------------------------|-----------------------------|----------------------------|
| <b>Thrombolysis</b>                              |                           |                          |                             |                            |
| Yes                                              | 4 (50%)                   | 0 (0%)                   | 9 (90%)                     | 100 (56.8%)                |
| No                                               | 4 (50%)                   | 1 (100%)                 | 1 (10%)                     | 76 (43.2%)                 |
| <b>Door to Needle time (mins)</b>                |                           |                          |                             |                            |
| Median [Q1, Q3]                                  | NA                        | NA                       | NA                          | NA                         |
| Missing                                          | 8 (100%)                  | 1 (100%)                 | 10 (100%)                   | 176 (100%)                 |
| <b>Door in Door out time (mins)</b>              |                           |                          |                             |                            |
| Median [Q1, Q3]                                  | 89.5 [78.8, 104]          | NA                       | 99 [92.5, 114]              | 132 [108, 167]             |
| Missing                                          | 4 (50%)                   | 1 (100%)                 | 3 (30%)                     | 85 (48.3%)                 |
| <b>Multi-leg outbound journey</b>                |                           |                          |                             |                            |
| TRUE                                             | 0 (0%)                    | 1 (100%)                 | 1 (10%)                     | 82 (46.6%)                 |
| FALSE                                            | 8 (100%)                  | 0 (0%)                   | 8 (80%)                     | 71 (40.3%)                 |
| Unknown                                          | 0 (0%)                    | 0 (0%)                   | 1 (10%)                     | 23 (13.1%)                 |
| <b>Outbound transport involving air transfer</b> |                           |                          |                             |                            |
| TRUE                                             | 0 (0%)                    | 1 (100%)                 | 1 (10%)                     | 83 (47.2%)                 |
| FALSE                                            | 8 (100%)                  | 0 (0%)                   | 8 (80%)                     | 76 (43.2%)                 |
| Unknown                                          | 0 (0%)                    | 0 (0%)                   | 1 (10%)                     | 17 (9.7%)                  |
| <b>PSC to CSC travel time (mins)</b>             |                           |                          |                             |                            |
| Median [Q1, Q3]                                  | 28 [26, 43]               | NA                       | 77 [73.5, 79.5]             | 90 [73, 104]               |
| Missing                                          | 3 (37.5%)                 | 1 (100%)                 | 3 (30%)                     | 70 (39.8%)                 |



**Supplementary Table 3.** Univariable analysis (Kruskal-Wallis  $\chi^2$ ) of variables of interest and DIDO

| Variable                                                      | n   | $\chi^2$ | p-value   |
|---------------------------------------------------------------|-----|----------|-----------|
| Outbound crew – metropolitan patients only                    | 189 | 6.869    | 1.33e-15  |
| Outbound crew – regional patients only                        | 101 | 0.13966  | 0.7086    |
| Thrombolysis – metropolitan patients only                     | 264 | 6.688    | 0.0097    |
| Thrombolysis – regional patients only                         | 176 | 0.36086  | 0.5480    |
| Transport mode (air or ground) – regional patients only       | 159 | 16.62    | 4.566e-05 |
| Outbound ambulance dispatch code – metropolitan patients only | 234 | 11.258   | 7.926e-4  |
| Outbound ambulance dispatch code – regional patients only     | 114 | 7.9584   | 0.0048    |

**Supplementary figure 1.** Association between PSC case volume/site experience and DIDO.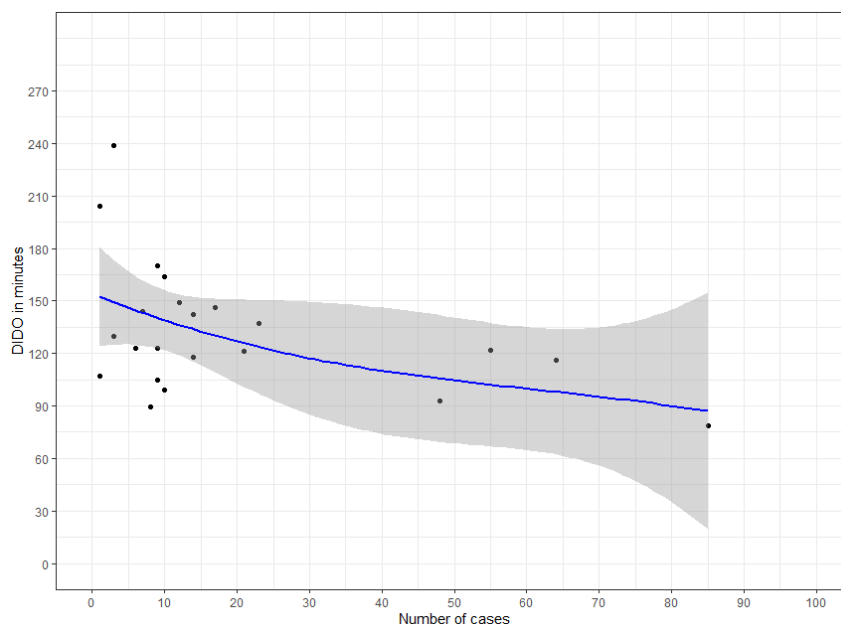

There was a trend towards lower DIDO with higher case volume in univariable analysis (see Figure below), however this did not reach statistical significance (Spearman's rho for non-parametric data = -0.357,  $p = 0.102$ ). PSC case volume was included in the multivariable regression analysis for regional and metropolitan sites (see Supplementary Table 2), but no statistically significant association was found.

**Supplementary Table 4.** Regression model results after forward selection of significant variables

Variables included in all initial linear regression models were: Age, sex, NIHSS score at PSC, baseline mRS score, thrombolysis, weekday/weekend, time of day (working hours/after hours), ambulance dispatch code, outbound ambulance crew, case volume (total number of transfers made by that PSC during the study period). The models were refined by identifying the most significant variables using the Akaike Information Criterion and included in the final models below.

## 1. Overall DIDO for all patients

|                                                                                                           | Estimate | Std. Error | t value | p value |    |
|-----------------------------------------------------------------------------------------------------------|----------|------------|---------|---------|----|
| (Intercept)                                                                                               | 51.4792  | 59.9625    | 0.859   | 0.39152 |    |
| Outbound crew (different)                                                                                 | 53.6718  | 17.3654    | 3.091   | 0.00225 | ** |
| mRS score [linear]                                                                                        | -10.1559 | 67.0592    | -0.151  | 0.87976 |    |
| mRS score [quadratic]                                                                                     | 9.2704   | 57.7877    | 0.16    | 0.87269 |    |
| mRS score [cubic]                                                                                         | -35.2313 | 75.4497    | -0.467  | 0.64099 |    |
| NIHSS score at PSC                                                                                        | -1.5377  | 1.134      | -1.356  | 0.17646 |    |
| Ambulance dispatch code<br>(Category >2 (less urgent))                                                    | 38.892   | 22.259     | 1.747   | 0.08197 | .  |
| Thrombolysis (yes)                                                                                        | -47.5743 | 16.7369    | -2.842  | 0.00489 | ** |
| Patient age                                                                                               | 1.1021   | 0.6968     | 1.582   | 0.11517 |    |
| Signif. codes: 0 '***' 0.001 '**' 0.01 '*' 0.05 '.' 0.1                                                   |          |            |         |         |    |
| Residual standard error: 118.1 on 224 degrees of freedom<br>(220 observations deleted due to missingness) |          |            |         |         |    |
| Multiple R-squared: 0.1096, Adjusted R-squared: 0.06986                                                   |          |            |         |         |    |
| F-statistic: 2.758 on 10 and 224 DF, p-value: 0.003164                                                    |          |            |         |         |    |

This model suggests that using a different ambulance crew to transport the patient between PSC and CSC adds 53.7 minutes to DIDO, while the patient receiving thrombolysis reduced DIDO by 47.6 minutes. Note that 220/455 patients were missing data. This result was not reported in the main manuscript as the model is skewed towards metropolitan patients.

## 2. DIDO for metropolitan patients only (n=279)

|                                                                                                           | Estimate | Std. Error | t value | p value |    |
|-----------------------------------------------------------------------------------------------------------|----------|------------|---------|---------|----|
| (Intercept)                                                                                               | 13.6487  | 81.6609    | 0.167   | 0.8675  |    |
| Outbound crew (different)                                                                                 | 71.7545  | 25.0856    | 2.86    | 0.00486 | ** |
| mRS score [linear]                                                                                        | -21.265  | 80.9472    | -0.263  | 0.79316 |    |
| mRS score [quadratic]                                                                                     | 45.757   | 78.5526    | 0.583   | 0.56114 |    |
| mRS score [cubic]                                                                                         | -33.7884 | 94.4443    | -0.358  | 0.72105 |    |
| NIHSS score at PSC                                                                                        | -1.3686  | 1.738      | -0.787  | 0.43229 |    |
| Ambulance dispatch code<br>(Category >2 (less urgent))                                                    | 25.5126  | 43.4557    | 0.587   | 0.55806 |    |
| Thrombolysis (yes)                                                                                        | -68.8786 | 24.94      | -2.762  | 0.0065  | ** |
| Patient age                                                                                               | 1.3837   | 0.9779     | 1.415   | 0.15924 |    |
| Signif. codes: 0 '***' 0.001 '**' 0.01 '*' 0.05 '.' 0.1                                                   |          |            |         |         |    |
| Residual standard error: 140.8 on 144 degrees of freedom<br>(124 observations deleted due to missingness) |          |            |         |         |    |
| Multiple R-squared: 0.1334, Adjusted R-squared: 0.07317                                                   |          |            |         |         |    |
| F-statistic: 2.216 on 10 and 144 DF, p-value: 0.01993                                                     |          |            |         |         |    |

This model using metropolitan patient transfers only suggest that using a different ambulance crew to transport the patient adds 71.8 minutes to DIDO, while the patient receiving thrombolysis reduced DIDO by 68.9 minutes.

## 3. DIDO for regional patients only (n=176)

|                                                                                                        | Estimate | Std. Error | t value | p value  |     |
|--------------------------------------------------------------------------------------------------------|----------|------------|---------|----------|-----|
| (Intercept)                                                                                            | 121.1917 | 16.8446    | 7.195   | 4.00E-10 | *** |
| NIHSS score at PSC                                                                                     | -1.9105  | 0.6709     | -2.848  | 0.00568  | **  |
| Ambulance dispatch code<br>(Category >2 (less urgent))                                                 | 25.3655  | 12.1908    | 2.081   | 0.040876 | *   |
| Transport mode (Air transfer)                                                                          | 45.9438  | 11.6238    | 3.953   | 0.000173 | *** |
| PSC case volume                                                                                        | 1.7071   | 0.8655     | 1.972   | 0.052259 | .   |
| Signif. codes: 0 '***' 0.001 '**' 0.01 '*' 0.05 '.' 0.1                                                |          |            |         |          |     |
| Residual standard error: 42.9 on 75 degrees of freedom<br>(96 observations deleted due to missingness) |          |            |         |          |     |
| Multiple R-squared: 0.3472, Adjusted R-squared: 0.3124                                                 |          |            |         |          |     |
| F-statistic: 9.972 on 4 and 75 DF, p-value: 1.59e-06                                                   |          |            |         |          |     |

Mode of transport was included in the multivariable regression analysis for regional patients. There were too few (n=3) air transfers in the metropolitan cohort.
